# Supplementary material
Source: PubMed Central journal article supplement (PMC3889603)

**Supplemental Table S1: Bacterial strains, vectors and primers used in this study.**

| <b><i>L. reuteri</i> Strains</b>         | <b>Description</b>                                                                                                                              | <b>Source</b>                  |
|------------------------------------------|-------------------------------------------------------------------------------------------------------------------------------------------------|--------------------------------|
| WT 6475                                  | <i>L. reuteri</i> ATCC PTA 6475, isolated from Finnish mother's milk                                                                            | BioGaia AB (Stockholm, Sweden) |
| WT 6475_pJP042                           | <i>L. reuteri</i> ATCC PTA 6475_pJP042, Em <sup>r</sup> , harboring the recombinering plasmid pJP042                                            | (22)                           |
| 6475:: <i>rsiR</i><br>(HMPREF0536_10683) | <i>L. reuteri</i> ATCC PTA 6475 <i>rsiR</i> ::pORI28, Em <sup>r</sup> , <i>rsiR</i> insertion mutant                                            | This study                     |
| 6475 <i>rsiR</i> -Stop                   | <i>L. reuteri</i> ATCC PTA 6475 <i>rsiR</i> ::STOP, recombinered mutant with stop codon mutation in <i>rsiR</i>                                 | This study                     |
| 6475Δ <i>rsiR</i>                        | <i>L. reuteri</i> ATCC PTA 6475 Δ <i>rsiR</i> , recombinered mutant with stop codon deletion in <i>rsiR</i>                                     | This study                     |
| 6475:: <i>rsiR</i><br>_pJKS104           | <i>L. reuteri</i> ATCC PTA 6475 <i>rsiR</i> ::pORI28_pJKS104, Em <sup>r</sup> , Cm <sup>r</sup> , complemented <i>rsiR</i> insertion mutant     | This study                     |
| WT 6475_pPH-R1                           | <i>L. reuteri</i> ATCC PTA 6475_pPH-R1, Cm <sup>r</sup> , WT 6475 harboring the <i>gusA</i> reporter plasmid                                    | This study                     |
| 6475Δ <i>rsiR</i> _pPH-R1                | <i>L. reuteri</i> ATCC PTA 6475 Δ <i>rsiR</i> _pPH-R1, Cm <sup>r</sup> , <i>rsiR</i> deletion mutant harboring the <i>gusA</i> reporter plasmid | This study                     |

| <b>Vector</b>                         | <b>Description</b>                                                                                                                    | <b>Source</b>            |
|---------------------------------------|---------------------------------------------------------------------------------------------------------------------------------------|--------------------------|
| pVE6007                               | Cm <sup>r</sup> <i>repA</i> -positive temperature-sensitive derivative of pWV01                                                       | (21)                     |
| pORI28                                | Em <sup>r</sup> <i>repA</i> -negative derivative of pWV01                                                                             | (20)                     |
| pJP059                                | Cm <sup>r</sup> <i>plasmid used to evaluate transformation efficiency for recombineering</i>                                          | (22)                     |
| pCR <sup>®</sup> 2.1                  | Cloning vector                                                                                                                        | Invitrogen, Carlsbad, CA |
| pJKS100                               | <i>E. coli</i> – <i>L. reuteri</i> shuttle vector containing <i>L. lactis</i> P <sub>23</sub> promoter, Cm <sup>r</sup>               | (24)                     |
| pJKS104                               | pJKS100 derivative expressing 6475 <i>rsiR</i> gene under control of its natural promoter, Cm <sup>r</sup>                            | This study               |
| pGK12                                 | Contained hyperactive <i>gusA3</i> reporter gene                                                                                      | (30)                     |
| pPH-R1                                | pJKS100 derivative expressing <i>gusA</i> reporter gene from pGK12, under control of P <sub><i>hdcAB</i></sub> promoter               | This study               |
| <b>Recombineering oligonucleotide</b> | <b>Sequence (5' to 3')</b>                                                                                                            | <b>Gene targeted</b>     |
| oJP577                                | TCAAACCACCAGGACCAA<br>GCGCTGAAAGACGACGCT<br>TTCTGCTTAATTCACCTAA<br>TGGGTTGGTTTGATCCAT<br>GAACTGG, positive control for recombineering | <i>rpoB</i> (22)         |

|                |                                                                                                                                        |                      |
|----------------|----------------------------------------------------------------------------------------------------------------------------------------|----------------------|
| o977stop       | CGGGTAGAATAAGACTTG<br>AGGAGGTCTTTAGAATGA<br>ACCTATGATAACTTATTGT<br>AGGAATTATTATGATTGTA<br>TTAGCC, for stop codon<br>mutation           | <i>rsiR</i>          |
| o $\Delta$ 977 | CATCCGGGTAGAATAAGA<br>CTTGAGGAGGTCTTTAGA<br>ATGGAATAAATTATGCTAA<br>TTATTGGGCAATCCAATGA<br>TATTCGCTTTTAGC, for<br>clean deletion mutant | <i>rsiR</i>          |
| <b>Primers</b> | <b>Primer sequence (5' to 3')</b>                                                                                                      | <b>Gene targeted</b> |
| <i>rsiR</i> -F | GCAAATCAGAAGATAATTT<br>CTGGTTTGC, for <i>rsiR</i><br>cloning                                                                           | <i>rsiR</i>          |
| <i>rsiR</i> -R | CCAGCTAGCCCAATTAGT<br>CTAAAACAG, for <i>rsiR</i><br>cloning                                                                            | <i>rsiR</i>          |
| <i>cat</i> -F  | GGCATATCAAATGAACTTT<br>AATAAAATTGA                                                                                                     | <i>cat</i>           |
| <i>cat</i> -R  | CGGCATTATCTCATATTAT<br>AAAAGCCAG                                                                                                       | <i>cat</i>           |
| KJP15          | GTTCTTGAATCTAATCAAT<br>ATG, for screening of<br>recombineered mutants                                                                  | <i>rsiR</i>          |
| KJP16          | CCATTGAGCAATTTTAATA<br>GTTG, for screening of<br>recombineered mutants                                                                 | <i>rsiR</i>          |
| KJP33          | GGTCTTTAGAATGAACCTA<br>TG                                                                                                              | <i>rsiR</i>          |

|                         |                                                                                      |                                   |
|-------------------------|--------------------------------------------------------------------------------------|-----------------------------------|
| $P_{hdcAB}$ -F          | TGACGGATCCTAACAGGA<br>ACTAATGGTAAGGGATC,<br>amplification of $P_{hdcAB}$<br>promoter | $P_{hdcAB}$ promoter              |
| $P_{hdcAB}$ -R          | TGACGAATTCCGCCTGTT<br>TCCAATGTATTATCA,<br>amplification of $P_{hdcAB}$<br>promoter   | $P_{hdcAB}$ promoter              |
| LR0977 5'-BHI           | TGACGGATCCTAACGATT<br>GTTAGAGGTTTTGGGAAT,<br>amplification of pORI28<br>insert       | <i>rsiR</i>                       |
| LR0977 3'-ERI           | TGACGAATTCGCAATGGA<br>AGATAGATAGTACAC,<br>amplification of pORI28<br>insert          | <i>rsiR</i>                       |
| <b>qPCR Primer Name</b> | <b>Primer Sequence</b>                                                               | <b>Universal Probe<br/>Number</b> |
| rpoB-F                  | CGTGATACTTCATTACGTG<br>TTCCT                                                         | 77                                |
| rpoB-R                  | AGTGAAGACTTTAACATCT<br>TGGATGA                                                       |                                   |
| hdcA-F                  | GCACTAACGATAACCGTC<br>GTC                                                            | 1                                 |
| hdcA-R                  | CACCCTTATTAGCACAAAC<br>AATGA                                                         |                                   |
| hdcB-F                  | TGCAAGATCGGATATCAC<br>AAA                                                            | 162                               |
| hdcB-F                  | TTGACGAATTCAACCTTCT<br>TTACA                                                         |                                   |
| hdcP-F                  | TCCCTACGGATACCAAGC<br>AC                                                             | 15                                |

|        |                            |  |
|--------|----------------------------|--|
| hdcP-R | AGAGGAACGCTAAGACAC<br>CAAT |  |
|--------|----------------------------|--|

**Supplemental Table S2: RNA-seq data revealed 195 *L. reuteri* genes downregulated >1.5-fold in 6475*rsiR*-Stop mutant compared to WT 6475.**

| <b>Locus tag</b> | <b>Protein ID</b> | <b>Gene name</b> | <b>Annotation</b>                                      | <b>Fold downregulation</b> |
|------------------|-------------------|------------------|--------------------------------------------------------|----------------------------|
| HMPREF0536_11827 | ZP_08162905.1     | <i>hdcA</i>      | histidine<br>decarboxylase<br>subunit proenzyme        | 3.76                       |
| HMPREF0536_11825 | ZP_08162903.1     | <i>hisS</i>      | histidine-tRNA<br>ligase                               | 3.70                       |
| HMPREF0536_10674 | ZP_08161754.1     | <i>fabD</i>      | malonyl-CoA-[acyl-<br>carrier-protein]<br>transacylase | 3.41                       |
| HMPREF0536_10758 | ZP_08161837.1     | <i>scrK2</i>     | fructokinase                                           | 3.18                       |
| HMPREF0536_10672 | ZP_08161752.1     | <i>fabH</i>      | 3-oxoacyl-(acyl-<br>carrier-protein)<br>synthase III   | 3.05                       |
| HMPREF0536_11463 | ZP_08162541.1     | <i>rplV</i>      | 50S ribosomal<br>protein L22                           | 2.76                       |
| HMPREF0536_10052 | ZP_08161134.1     | N/A              | GDSL family<br>lipase                                  | 2.72                       |
| HMPREF0536_10148 | ZP_08161229.1     | N/A              | SNF2/helicase<br>domain protein                        | 2.67                       |

|                  |               |                        |                                                           |      |
|------------------|---------------|------------------------|-----------------------------------------------------------|------|
| HMPREF0536_10757 | ZP_08161836.1 | <i>scrK</i>            | fructokinase                                              | 2.65 |
| HMPREF0536_10827 | ZP_08161906.1 | N/A                    | prophage Lp2<br>protein 43                                | 2.62 |
| HMPREF0536_10827 | ZP_08161906.1 | N/A                    | prophage Lp2<br>protein 43                                | 2.62 |
| HMPREF0536_10761 | ZP_08161840.1 | <i>lrgA</i>            | murein hydrolase<br>regulator LrgA                        | 2.62 |
| HMPREF0536_10036 | ZP_08161118.1 | N/A                    | phage portal<br>protein                                   | 2.52 |
| HMPREF0536_11982 | ZP_08163060.1 | N/A                    | hypothetical<br>protein                                   | 2.51 |
| HMPREF0536_10095 | ZP_08161176.1 | <i>lacZ</i>            | beta-galactosidase<br>1                                   | 2.41 |
| HMPREF0536_10759 | ZP_08161838.1 | <i>ldh</i>             | L-lactate<br>dehydrogenase                                | 2.40 |
| HMPREF0536_10141 | ZP_08161222.1 | <i>mmu</i><br><i>M</i> | homocysteine S-<br>methyltransferase                      | 2.39 |
| HMPREF0536_11780 | ZP_08162858.1 | N/A                    | ABC superfamily<br>ATP binding<br>cassette<br>transporter | 2.29 |
| HMPREF0536_10760 | ZP_08161839.1 | <i>lrgB</i>            | murein hydrolase<br>regulator LrgB                        | 2.28 |

|                  |               |              |                                                      |      |
|------------------|---------------|--------------|------------------------------------------------------|------|
| HMPREF0536_10169 | ZP_08161250.1 | N/A          | transposase                                          | 2.26 |
| HMPREF0536_11485 | ZP_08162563.1 | <i>lysP2</i> | APC family lysine transporter                        | 2.26 |
| HMPREF0536_11864 | ZP_08162942.1 | <i>npp</i>   | type I phosphodiesterase /nucleotide pyrophosphatase | 2.25 |
| HMPREF0536_11904 | ZP_08162982.1 | N/A          | cell surface hydrolase                               | 2.24 |
| HMPREF0536_11817 | ZP_08162895.1 | N/A          | MATE efflux family protein                           | 2.21 |
| HMPREF0536_10679 | ZP_08161759.1 | <i>accC</i>  | acetyl-CoA carboxylase                               | 2.20 |
| HMPREF0536_10041 | ZP_08161123.1 | N/A          | hypothetical protein                                 | 2.18 |
| HMPREF0536_11567 | ZP_08162645.1 | N/A          | phosphatase                                          | 2.14 |
| HMPREF0536_11913 | ZP_08162991.1 | N/A          | deaminase-reductase domain protein                   | 2.13 |
| HMPREF0536_10043 | ZP_08161125.1 | N/A          | phage major tail protein                             | 2.12 |
| HMPREF0536_11876 | ZP_08162954.1 | N/A          | nitroreductase                                       | 2.10 |
| HMPREF0536_11621 | ZP_08162699.1 | N/A          | YhgE/Pip domain                                      | 2.09 |



|                  |               |              |                                  |      |
|------------------|---------------|--------------|----------------------------------|------|
|                  |               |              | protein                          |      |
| HMPREF0536_11988 | ZP_08163066.1 | <i>ldhA3</i> | D-lactate dehydrogenase          | 2.09 |
| HMPREF0536_10820 | ZP_08161899.1 | <i>N/A</i>   | phage lysin                      | 2.08 |
| HMPREF0536_11939 | ZP_08163017.1 | <i>trmE</i>  | tRNA modification<br>GTPase TrmE | 2.07 |
| HMPREF0536_10046 | ZP_08161128.1 | <i>ppx</i>   | exopolyphosphatase               | 2.05 |
| HMPREF0536_10807 | ZP_08161886.1 | <i>gntK</i>  | gluconokinase                    | 2.04 |
| HMPREF0536_10634 | ZP_08161714.1 | <i>N/A</i>   | RNA-directed DNA polymerase      | 2.01 |
| HMPREF0536_11610 | ZP_08162688.1 | <i>N/A</i>   | hypothetical protein             | 2.01 |
| HMPREF0536_10346 | ZP_08161426.1 | <i>aad</i>   | aldehyde-alcohol dehydrogenase   | 2.01 |
| HMPREF0536_11903 | ZP_08162981.1 | <i>mhpD</i>  | 2-oxopent-4-enoate hydratase     | 2.00 |
| HMPREF0536_12008 | ZP_08163086.1 | <i>gshA</i>  | glutamate-cysteine ligase        | 2.00 |
| HMPREF0536_10783 | ZP_08161862.1 | <i>N/A</i>   | major facilitator transporter    | 2.00 |
| HMPREF0536_11970 | ZP_08163048.1 | <i>N/A</i>   | alpha/beta knot family protein   | 1.98 |

|                  |               |                  |                                                                         |      |
|------------------|---------------|------------------|-------------------------------------------------------------------------|------|
| HMPREF0536_11902 | ZP_08162980.1 | <i>hicD3</i>     | L-2-hydroxyisocaproate dehydrogenase                                    | 1.97 |
| HMPREF0536_11142 | ZP_08162221.1 | <i>plsX</i>      | fatty acid/phospholipid synthesis protein<br>PlsX                       | 1.97 |
| HMPREF0536_10105 | ZP_08161186.1 | N/A              | hypothetical protein                                                    | 1.95 |
| HMPREF0536_10183 | ZP_08161264.1 | <i>nhaC</i>      | NhaC family sodium:proton (Na <sup>+</sup> :H <sup>+</sup> ) antiporter | 1.95 |
| HMPREF0536_11824 | ZP_08162902.1 | <i>nhaC</i><br>2 | NhaC family sodium:proton (Na <sup>+</sup> :H) antiporter               | 1.94 |
| HMPREF0536_12047 | ZP_08163125.1 | <i>glnP4</i>     | glutamine ABC superfamily ATP binding cassette transporter              | 1.92 |
| HMPREF0536_10107 | ZP_08161188.1 | <i>sdhA</i>      | L-serine ammonia-lyase alpha subunit                                    | 1.92 |

|                  |               |             |                                                                      |      |
|------------------|---------------|-------------|----------------------------------------------------------------------|------|
| HMPREF0536_10210 | ZP_08161291.1 | <i>metN</i> | methionine ABC<br>superfamily ATP<br>binding cassette<br>transporter | 1.91 |
| HMPREF0536_11487 | ZP_08162565.1 | <i>N/A</i>  | phosphatase                                                          | 1.90 |
| HMPREF0536_11462 | ZP_08162540.1 | <i>rpsC</i> | 30S ribosomal<br>protein S3                                          | 1.90 |
| HMPREF0536_11085 | ZP_08162164.1 | <i>mraY</i> | phospho-N-<br>acetylmuramoyl-<br>pentapeptide-<br>transferase        | 1.89 |
| HMPREF0536_11735 | ZP_08162813.1 | <i>pduD</i> | propanediol<br>dehydratase<br>medium subunit                         | 1.88 |
| HMPREF0536_10049 | ZP_08161131.1 | <i>N/A</i>  | chromosome<br>segregation<br>ATPase family<br>protein                | 1.88 |
| HMPREF0536_11723 | ZP_08162801.1 | <i>pduQ</i> | propanol<br>dehydrogenase                                            | 1.88 |
| HMPREF0536_10755 | ZP_08161834.1 | <i>aga</i>  | alpha-<br>galactosidase                                              | 1.88 |
| HMPREF0536_10109 | ZP_08161190.1 | <i>trxB</i> | thioredoxin-                                                         | 1.88 |

|                  |               |             |                                                                   |      |
|------------------|---------------|-------------|-------------------------------------------------------------------|------|
|                  |               |             | disulfide reductase                                               |      |
| HMPREF0536_11488 | ZP_08162566.1 | N/A         | hypothetical protein                                              | 1.87 |
| HMPREF0536_11980 | ZP_08163058.1 | <i>macB</i> | macrolide export ABC superfamily ATP binding cassette transporter | 1.86 |
| HMPREF0536_11313 | ZP_08162391.1 | N/A         | hypothetical protein                                              | 1.85 |
| HMPREF0536_11526 | ZP_08162604.1 | <i>dacC</i> | D-alanyl-D-alanine serine-type carboxypeptidase                   | 1.85 |
| HMPREF0536_10268 | ZP_08161349.1 | N/A         | RNA-directed DNA polymerase                                       | 1.85 |
| HMPREF0536_10677 | ZP_08161757.1 | <i>accB</i> | acetyl-CoA carboxylase biotin carboxyl carrier subunit            | 1.85 |
| HMPREF0536_10211 | ZP_08161292.1 | <i>metQ</i> | D-methionine ABC superfamily ATP binding cassette transporter     | 1.83 |

|                  |               |                  |                                                                     |      |
|------------------|---------------|------------------|---------------------------------------------------------------------|------|
| HMPREF0536_11529 | ZP_08162607.1 | N/A              | MFS family major<br>facilitator<br>transporter                      | 1.83 |
| HMPREF0536_10764 | ZP_08161843.1 | N/A              | band 7 family<br>membrane protein                                   | 1.82 |
| HMPREF0536_10128 | ZP_08161209.1 | <i>rfbD</i>      | dTDP-4-<br>dehydrorhamnose<br>reductase                             | 1.82 |
| HMPREF0536_11742 | ZP_08162820.1 | N/A              | hypothetical<br>protein                                             | 1.80 |
| HMPREF0536_11030 | ZP_08162109.1 | <i>comE</i><br>A | competence<br>protein ComEA                                         | 1.79 |
| HMPREF0536_11116 | ZP_08162195.1 | N/A              | RecT protein                                                        | 1.79 |
| HMPREF0536_11553 | ZP_08162631.1 | <i>pstA</i>      | phosphate ABC<br>superfamily ATP<br>binding cassette<br>transporter | 1.79 |
| HMPREF0536_10316 | ZP_08161396.1 | <i>metC</i>      | cystathionine beta-<br>lyase                                        | 1.79 |
| HMPREF0536_10675 | ZP_08161755.1 | <i>fabG2</i>     | 3-oxoacyl-[acyl-<br>carrier-protein]<br>reductase                   | 1.78 |
| HMPREF0536_11414 | ZP_08162492.1 | N/A              | RNA-directed DNA                                                    | 1.78 |

|                  |               |             |                                                            |      |
|------------------|---------------|-------------|------------------------------------------------------------|------|
|                  |               |             | polymerase                                                 |      |
| HMPREF0536_11737 | ZP_08162815.1 | <i>pduB</i> | propanediol<br>utilization protein<br>PduB                 | 1.77 |
| HMPREF0536_11400 | ZP_08162478.1 | N/A         | hypothetical<br>protein                                    | 1.77 |
| HMPREF0536_10822 | ZP_08161901.1 | N/A         | prophage Lp2<br>protein 48                                 | 1.77 |
| HMPREF0536_10217 | ZP_08161298.1 | N/A         | aminotransferase                                           | 1.76 |
| HMPREF0536_10475 | ZP_08161555.1 | N/A         | hypothetical<br>protein                                    | 1.76 |
| HMPREF0536_11316 | ZP_08162394.1 | N/A         | hypothetical<br>protein                                    | 1.75 |
| HMPREF0536_10033 | ZP_08161115.1 | N/A         | hypothetical<br>protein                                    | 1.75 |
| HMPREF0536_11857 | ZP_08162935.1 | <i>tdh</i>  | L-threonine 3-<br>dehydrogenase                            | 1.75 |
| HMPREF0536_12022 | ZP_08163100.1 | N/A         | glutamine<br>amidotransferase<br>class-I domain<br>protein | 1.75 |
| HMPREF0536_11422 | ZP_08162500.1 | <i>rumA</i> | 23S rRNA (uracil-<br>5-)-                                  | 1.75 |

|                  |               |              |                                                                     |      |
|------------------|---------------|--------------|---------------------------------------------------------------------|------|
|                  |               |              | methyltransferase                                                   |      |
| HMPREF0536_10942 | ZP_08162021.1 | <i>glnP2</i> | glutamine ABC<br>superfamily ATP<br>binding cassette<br>transporter | 1.75 |
| HMPREF0536_10301 | ZP_08161381.1 | N/A          | phosphoesterase                                                     | 1.75 |
| HMPREF0536_10279 | ZP_08161359.1 | N/A          | hydratase/decarbo<br>xylase                                         | 1.74 |
| HMPREF0536_11938 | ZP_08163016.1 | <i>gidA</i>  | glucose inhibited<br>division protein A                             | 1.74 |
| HMPREF0536_10747 | ZP_08161826.1 | <i>dnaD</i>  | DNA replication<br>protein DnaD                                     | 1.74 |
| HMPREF0536_11954 | ZP_08163032.1 | <i>rplI</i>  | 50S ribosomal<br>protein L9                                         | 1.73 |
| HMPREF0536_10603 | ZP_08161683.1 | N/A          | hypothetical<br>protein                                             | 1.72 |
| HMPREF0536_12046 | ZP_08163124.1 | <i>serS</i>  | serine--tRNA<br>ligase                                              | 1.72 |
| HMPREF0536_10146 | ZP_08161227.1 | N/A          | hypothetical<br>protein                                             | 1.72 |
| HMPREF0536_10373 | ZP_08161453.1 | N/A          | carbon-nitrogen<br>family hydrolase                                 | 1.72 |
| HMPREF0536_11451 | ZP_08162529.1 | <i>rpsE</i>  | 30S ribosomal                                                       | 1.72 |

|                  |               |             |                                                                               |      |
|------------------|---------------|-------------|-------------------------------------------------------------------------------|------|
|                  |               |             | protein S5                                                                    |      |
| HMPREF0536_12042 | ZP_08163120.1 | N/A         | surface protein                                                               | 1.71 |
| HMPREF0536_12074 | ZP_08163152.1 | <i>pyrC</i> | dihydroorotase                                                                | 1.71 |
| HMPREF0536_10249 | ZP_08161330.1 | <i>pyrG</i> | CTP synthase                                                                  | 1.70 |
| HMPREF0536_10838 | ZP_08161917.1 | N/A         | hypothetical<br>protein                                                       | 1.70 |
| HMPREF0536_11644 | ZP_08162722.1 | N/A         | transposase                                                                   | 1.70 |
| HMPREF0536_11518 | ZP_08162596.1 | <i>lysR</i> | malolactic<br>regulator                                                       | 1.70 |
| HMPREF0536_11143 | ZP_08162222.1 | <i>recG</i> | DNA helicase<br>RecG                                                          | 1.69 |
| HMPREF0536_10302 | ZP_08161382.1 | N/A         | hypothetical<br>protein                                                       | 1.69 |
| HMPREF0536_11901 | ZP_08162979.1 | N/A         | aminotransferase                                                              | 1.69 |
| HMPREF0536_11730 | ZP_08162808.1 | N/A         | carbon dioxide<br>concentrating<br>mechanism/carbox<br>ysome shell<br>protein | 1.69 |
| HMPREF0536_11734 | ZP_08162812.1 | <i>dhaE</i> | glycerol<br>dehydratase                                                       | 1.68 |
| HMPREF0536_11804 | ZP_08162882.1 | N/A         | hypothetical<br>protein                                                       | 1.68 |



|                  |               |             |                                 |      |
|------------------|---------------|-------------|---------------------------------|------|
| HMPREF0536_10470 | ZP_08161550.1 | N/A         | hypothetical protein            | 1.68 |
| HMPREF0536_10038 | ZP_08161120.1 | N/A         | phage major head protein        | 1.68 |
| HMPREF0536_10763 | ZP_08161842.1 | <i>lytS</i> | sensor histidine kinase LytS    | 1.67 |
| HMPREF0536_11577 | ZP_08162655.1 | <i>adhB</i> | alcohol dehydrogenase           | 1.67 |
| HMPREF0536_11568 | ZP_08162646.1 | N/A         | hypothetical protein            | 1.67 |
| HMPREF0536_10635 | ZP_08161715.1 | N/A         | hypothetical protein            | 1.67 |
| HMPREF0536_10375 | ZP_08161455.1 | <i>panE</i> | 2-dehydropantoate 2-reductase   | 1.67 |
| HMPREF0536_10035 | ZP_08161117.1 | N/A         | phage terminase large subunit   | 1.66 |
| HMPREF0536_11917 | ZP_08162995.1 | N/A         | hypothetical protein            | 1.66 |
| HMPREF0536_11863 | ZP_08162941.1 | N/A         | hypothetical protein            | 1.66 |
| HMPREF0536_10472 | ZP_08161552.1 | <i>nhaP</i> | Na-H antiporter                 | 1.66 |
| HMPREF0536_11729 | ZP_08162807.1 | <i>pduL</i> | propanediol utilization protein | 1.65 |

|                  |               |              |                                                                 |      |
|------------------|---------------|--------------|-----------------------------------------------------------------|------|
|                  |               |              | PduL                                                            |      |
| HMPREF0536_11571 | ZP_08162649.1 | <i>N/A</i>   | transposase                                                     | 1.65 |
| HMPREF0536_11733 | ZP_08162811.1 | <i>dhaF</i>  | glycerol<br>dehydratase<br>reactivation factor<br>large subunit | 1.65 |
| HMPREF0536_10859 | ZP_08161938.1 | <i>N/A</i>   | hypothetical<br>protein                                         | 1.65 |
| HMPREF0536_10957 | ZP_08162036.1 | <i>lexA</i>  | LexA repressor                                                  | 1.65 |
| HMPREF0536_11504 | ZP_08162582.1 | <i>ImrB2</i> | MFS family major<br>facilitator<br>transporter                  | 1.64 |
| HMPREF0536_11061 | ZP_08162140.1 | <i>lysA</i>  | diaminopimelate<br>decarboxylase                                | 1.64 |
| HMPREF0536_11736 | ZP_08162814.1 | <i>dhaB</i>  | glycerol<br>dehydratase                                         | 1.64 |
| HMPREF0536_11966 | ZP_08163044.1 | <i>vicX</i>  | metallo-beta-<br>lactamase<br>superfamily protein               | 1.64 |
| HMPREF0536_10222 | ZP_08161303.1 | <i>trpS</i>  | tryptophan--tRNA<br>ligase                                      | 1.64 |
| HMPREF0536_12005 | ZP_08163083.1 | <i>dltr</i>  | DNA-binding<br>response regulator                               | 1.64 |

|                  |               |                   |                                                                     |      |
|------------------|---------------|-------------------|---------------------------------------------------------------------|------|
| HMPREF0536_11753 | ZP_08162831.1 | N/A               | MFS family major<br>facilitator<br>transporter                      | 1.64 |
| HMPREF0536_12033 | ZP_08163111.1 | <i>pyraA</i><br>2 | carbamoyl-<br>phosphate<br>synthase                                 | 1.63 |
| HMPREF0536_10393 | ZP_08161473.1 | N/A               | MaoC family<br>protein                                              | 1.63 |
| HMPREF0536_10236 | ZP_08161317.1 | N/A               | zinc/iron ABC<br>superfamily ATP<br>binding cassette<br>transporter | 1.63 |
| HMPREF0536_10037 | ZP_08161119.1 | <i>clpP</i>       | ATP-dependent<br>Clp protease                                       | 1.63 |
| HMPREF0536_11802 | ZP_08162880.1 | <i>brnQ2</i>      | LIVCS family<br>branched chain<br>amino acid:cation<br>symporter    | 1.62 |
| HMPREF0536_10503 | ZP_08161583.1 | N/A               | multitransmembra<br>ne protein                                      | 1.62 |
| HMPREF0536_10818 | ZP_08161897.1 | N/A               | hypothetical<br>protein                                             | 1.62 |
| HMPREF0536_10455 | ZP_08161535.1 | N/A               | DMT superfamily                                                     | 1.62 |

|                  |               |              |                                                            |      |
|------------------|---------------|--------------|------------------------------------------------------------|------|
|                  |               |              | drug/metabolite<br>transporter                             |      |
| HMPREF0536_11692 | ZP_08162770.1 | <i>hemA</i>  | glutamyl-tRNA<br>reductase                                 | 1.61 |
| HMPREF0536_11271 | ZP_08162349.1 | <i>dgk</i>   | deoxynucleoside<br>kinase                                  | 1.61 |
| HMPREF0536_10722 | ZP_08161801.1 | N/A          | LysR family<br>transcriptional<br>regulator                | 1.61 |
| HMPREF0536_11055 | ZP_08162134.1 | <i>asd</i>   | aspartate-<br>semialdehyde<br>dehydrogenase                | 1.61 |
| HMPREF0536_11506 | ZP_08162584.1 | <i>rluD3</i> | ribosomal large<br>subunit<br>pseudouridine<br>synthase D  | 1.61 |
| HMPREF0536_11493 | ZP_08162571.1 | N/A          | protein of<br>hypothetical<br>function DUF125              | 1.61 |
| HMPREF0536_11732 | ZP_08162810.1 | N/A          | propanediol<br>dehydratase<br>reactivation protein<br>PduH | 1.60 |

|                  |               |             |                                                                      |      |
|------------------|---------------|-------------|----------------------------------------------------------------------|------|
| HMPREF0536_10986 | ZP_08162065.1 | <i>tsf</i>  | elongation factor<br>EF1B                                            | 1.60 |
| HMPREF0536_11611 | ZP_08162689.1 | <i>nox</i>  | NADH oxidase                                                         | 1.60 |
| HMPREF0536_11551 | ZP_08162629.1 | <i>phoU</i> | phosphate<br>transport system<br>regulatory protein<br>PhoU          | 1.60 |
| HMPREF0536_11973 | ZP_08163051.1 | <i>dhaT</i> | N/A                                                                  | 1.60 |
| HMPREF0536_10824 | ZP_08161903.1 | N/A         | hypothetical<br>protein                                              | 1.60 |
| HMPREF0536_11051 | ZP_08162130.1 | <i>glxK</i> | glycerate kinase                                                     | 1.60 |
| HMPREF0536_11554 | ZP_08162632.1 | <i>pstC</i> | phosphate ABC<br>superfamily ATP<br>binding cassette<br>transporter  | 1.60 |
| HMPREF0536_10259 | ZP_08161340.1 | N/A         | phosphoglycerate<br>mutase                                           | 1.59 |
| HMPREF0536_10319 | ZP_08161399.1 | <i>fliY</i> | amino acid ABC<br>superfamily ATP<br>binding cassette<br>transporter | 1.59 |
| HMPREF0536_10413 | ZP_08161493.1 | N/A         | APC family amino<br>acid transporter                                 | 1.57 |

|                  |               |             |                                                                           |      |
|------------------|---------------|-------------|---------------------------------------------------------------------------|------|
| HMPREF0536_10094 | ZP_08161175.1 | <i>lacS</i> | GPH family<br>lactose:cation<br>symporter                                 | 1.57 |
| HMPREF0536_10732 | ZP_08161811.1 | N/A         | DegV family<br>protein                                                    | 1.57 |
| HMPREF0536_10561 | ZP_08161641.1 | <i>glnQ</i> | glutamine ABC<br>superfamily ATP<br>binding cassette<br>transporter       | 1.56 |
| HMPREF0536_11066 | ZP_08162145.1 | N/A         | tetratricopeptide<br>TPR_2 repeat<br>protein                              | 1.56 |
| HMPREF0536_12003 | ZP_08163081.1 | N/A         | hypothetical<br>protein                                                   | 1.56 |
| HMPREF0536_10725 | ZP_08161804.1 | N/A         | glycerol-3-<br>phosphate<br>dehydrogenase                                 | 1.56 |
| HMPREF0536_10652 | ZP_08161732.1 | <i>mobB</i> | molybdopterin-<br>guanine<br>dinucleotide<br>biosynthesis<br>protein MobB | 1.56 |
| HMPREF0536_12031 | ZP_08163109.1 | N/A         | major facilitator                                                         | 1.55 |

|                  |               |              |                                                                     |      |
|------------------|---------------|--------------|---------------------------------------------------------------------|------|
|                  |               |              | transporter                                                         |      |
| HMPREF0536_11961 | ZP_08163039.1 | N/A          | multidrug ABC<br>superfamily ATP<br>binding cassette<br>transporter | 1.55 |
| HMPREF0536_10527 | ZP_08161607.1 | <i>araA</i>  | L-arabinose<br>isomerase                                            | 1.55 |
| HMPREF0536_10247 | ZP_08161328.1 | N/A          | hypothetical<br>protein                                             | 1.55 |
| HMPREF0536_12028 | ZP_08163106.1 | <i>tagE2</i> | poly(glycerol-<br>phosphate) alpha-<br>glucosyltransferas<br>e      | 1.55 |
| HMPREF0536_11255 | ZP_08162333.1 | <i>ldh3</i>  | L-lactate<br>dehydrogenase                                          | 1.55 |
| HMPREF0536_10762 | ZP_08161841.1 | <i>lytR</i>  | response regulator                                                  | 1.54 |
| HMPREF0536_10819 | ZP_08161898.1 | N/A          | ChvD family ATP-<br>binding cassette<br>protein                     | 1.53 |
| HMPREF0536_11539 | ZP_08162617.1 | <i>cysK</i>  | cysteine synthase                                                   | 1.53 |
| HMPREF0536_10253 | ZP_08161334.1 | N/A          | PTS family porter<br>cellobiose-specific<br>component IIC           | 1.53 |

|                  |               |              |                                                   |      |
|------------------|---------------|--------------|---------------------------------------------------|------|
| HMPREF0536_11715 | ZP_08162793.1 | N/A          | NADPH-<br>dependent FMN<br>reductase              | 1.53 |
| HMPREF0536_11465 | ZP_08162543.1 | <i>rplB</i>  | 50S ribosomal<br>protein L2                       | 1.53 |
| HMPREF0536_10531 | ZP_08161611.1 | N/A          | universal stress<br>protein                       | 1.53 |
| HMPREF0536_11873 | ZP_08162951.1 | N/A          | GNAT family<br>acetyltransferase                  | 1.53 |
| HMPREF0536_11448 | ZP_08162526.1 | <i>secY</i>  | preprotein<br>translocase<br>subunit SecY         | 1.53 |
| HMPREF0536_11790 | ZP_08162868.1 | N/A          | hypothetical<br>protein                           | 1.52 |
| HMPREF0536_11783 | ZP_08162861.1 | <i>cysK2</i> | cysteine synthase<br>A                            | 1.52 |
| HMPREF0536_10119 | ZP_08161200.1 | N/A          | sigma-70 family<br>RNA polymerase<br>sigma factor | 1.52 |
| HMPREF0536_10504 | ZP_08161584.1 | <i>pyrP</i>  | NCS2 family<br>uracil:cation<br>symporter-2       | 1.52 |
| HMPREF0536_10756 | ZP_08161835.1 | N/A          | LacI family                                       | 1.52 |



|                  |               |                  |                                                                                   |      |
|------------------|---------------|------------------|-----------------------------------------------------------------------------------|------|
|                  |               |                  | transcriptional<br>regulator                                                      |      |
| HMPREF0536_10816 | ZP_08161895.1 | N/A              | GDSL family<br>lipase                                                             | 1.52 |
| HMPREF0536_11042 | ZP_08162121.1 | <i>pdhA</i>      | pyruvate<br>dehydrogenase<br>complex E1<br>component alpha<br>subunit             | 1.52 |
| HMPREF0536_10556 | ZP_08161636.1 | <i>radC</i>      | DNA repair protein<br>RadC                                                        | 1.52 |
| HMPREF0536_10390 | ZP_08161470.1 | <i>comF</i><br>C | competence<br>protein FC                                                          | 1.51 |
| HMPREF0536_10710 | ZP_08161789.1 | <i>uvrA2</i>     | excision<br>endonuclease<br>subunit UvrA                                          | 1.51 |
| HMPREF0536_11680 | ZP_08162758.1 | N/A              | multidrug<br>resistance ABC<br>superfamily ATP<br>binding cassette<br>transporter | 1.51 |
| HMPREF0536_10776 | ZP_08161855.1 | N/A              | hypothetical<br>protein                                                           | 1.51 |

|                  |               |     |                                                                               |      |
|------------------|---------------|-----|-------------------------------------------------------------------------------|------|
| HMPREF0536_11738 | ZP_08162816.1 | N/A | carbon dioxide<br>concentrating<br>mechanism/carbox<br>ysome shell<br>protein | 1.51 |
| HMPREF0536_10214 | ZP_08161295.1 | N/A | fumarate<br>reductase                                                         | 1.51 |
| HMPREF0536_11272 | ZP_08162350.1 | N/A | mannosyl-<br>glycoprotein endo-<br>beta-N-<br>acetylglucosamida<br>se         | 1.51 |
| HMPREF0536_11059 | ZP_08162138.1 | N/A | M20/M25/M40<br>family peptidase                                               | 1.50 |



**Supplemental Table S3: RNA-seq data revealed 143 *L. reuteri* genes upregulated >1.5-fold in 6475*rsiR*-Stop mutant compared to WT 6475.**

| <b>Locus tag</b> | <b>Protein ID</b> | <b>Gene name</b> | <b>Annotation</b>                                    | <b>Fold upregulation</b> |
|------------------|-------------------|------------------|------------------------------------------------------|--------------------------|
| HMPREF0536_10683 | ZP_08161763.1     | <i>N/A</i>       | conserved<br>hypothetical<br>protein ( <i>rsiR</i> ) | 29.57                    |
| HMPREF0536_10227 | ZP_08161308.1     | <i>N/A</i>       | hypothetical<br>protein                              | 6.78                     |
| HMPREF0536_10417 | ZP_08161497.1     | <i>N/A</i>       | hypothetical<br>protein                              | 4.80                     |
| HMPREF0536_11519 | ZP_08162597.1     | <i>N/A</i>       | peptidyl-prolyl<br>cis-trans<br>isomerase            | 4.63                     |
| HMPREF0536_11799 | ZP_08162877.1     | <i>N/A</i>       | hypothetical<br>protein                              | 4.27                     |
| HMPREF0536_10349 | ZP_08161429.1     | <i>nrdH</i>      | glutaredoxin                                         | 4.13                     |
| HMPREF0536_11893 | ZP_08162971.1     | <i>N/A</i>       | HesB/YadR/YfhF<br>-family protein                    | 3.75                     |
| HMPREF0536_10492 | ZP_08161572.1     | <i>N/A</i>       | hypothetical<br>protein                              | 3.33                     |
| HMPREF0536_10136 | ZP_08161217.1     | <i>N/A</i>       | transposase                                          | 3.16                     |

|                  |               |                  |                                                         |      |
|------------------|---------------|------------------|---------------------------------------------------------|------|
| HMPREF0536_11350 | ZP_08162428.1 | N/A              | muramidase                                              | 3.14 |
| HMPREF0536_11287 | ZP_08162365.1 | N/A              | hypothetical<br>protein                                 | 3.06 |
| HMPREF0536_11028 | ZP_08162107.1 | <i>comE</i><br>C | ComE operon<br>protein 3                                | 2.86 |
| HMPREF0536_11044 | ZP_08162123.1 | N/A              | hypothetical<br>protein                                 | 2.86 |
| HMPREF0536_10880 | ZP_08161959.1 | N/A              | hypothetical<br>protein                                 | 2.85 |
| HMPREF0536_10429 | ZP_08161509.1 | <i>secG</i>      | preprotein<br>translocase<br>subunit SecG               | 2.78 |
| HMPREF0536_11383 | ZP_08162461.1 | N/A              | acetyltransferase                                       | 2.70 |
| HMPREF0536_10471 | ZP_08161551.1 | N/A              | hypothetical<br>protein                                 | 2.64 |
| HMPREF0536_11900 | ZP_08162978.1 | N/A              | hypothetical<br>protein                                 | 2.64 |
| HMPREF0536_11082 | ZP_08162161.1 | <i>ftsQ</i>      | cell division<br>protein FtsQ                           | 2.58 |
| HMPREF0536_11920 | ZP_08162998.1 | N/A              | YbaK/prolyl-<br>tRNA synthetase<br>associated<br>region | 2.50 |

|                  |               |             |                                                        |      |
|------------------|---------------|-------------|--------------------------------------------------------|------|
| HMPREF0536_10765 | ZP_08161844.1 | N/A         | NOL1/NOP2/sun family protein                           | 2.44 |
| HMPREF0536_10621 | ZP_08161701.1 | N/A         | hypothetical protein                                   | 2.39 |
| HMPREF0536_10733 | ZP_08161812.1 | <i>fbpA</i> | fibronectin-binding protein                            | 2.39 |
| HMPREF0536_11559 | ZP_08162637.1 | N/A         | hypothetical protein                                   | 2.34 |
| HMPREF0536_10643 | ZP_08161723.1 | <i>moaD</i> | molybdenum cofactor biosynthesis protein small subunit | 2.32 |
| HMPREF0536_11588 | ZP_08162666.1 | <i>wecD</i> | acetyltransferase                                      | 2.28 |
| HMPREF0536_11141 | ZP_08162220.1 | <i>acpA</i> | acyl carrier protein                                   | 2.27 |
| HMPREF0536_10626 | ZP_08161706.1 | N/A         | CRP/FNR family transcriptional regulator               | 2.26 |
| HMPREF0536_10881 | ZP_08161960.1 | N/A         | hypothetical protein                                   | 2.22 |
| HMPREF0536_10579 | ZP_08161659.1 | N/A         | protein of hypothetical                                | 2.20 |

|                  |               |             |                                                            |      |
|------------------|---------------|-------------|------------------------------------------------------------|------|
|                  |               |             | function DUF965                                            |      |
| HMPREF0536_10877 | ZP_08161956.1 | <i>asp</i>  | stress response<br>regulator Gls24                         | 2.19 |
| HMPREF0536_11596 | ZP_08162674.1 | <i>N/A</i>  | phage integrase<br>family site-<br>specific<br>recombinase | 2.18 |
| HMPREF0536_11393 | ZP_08162471.1 | <i>N/A</i>  | GNAT family<br>acetyltransferase                           | 2.17 |
| HMPREF0536_11343 | ZP_08162421.1 | <i>N/A</i>  | ISChy4<br>transposase                                      | 2.12 |
| HMPREF0536_10622 | ZP_08161702.1 | <i>N/A</i>  | hypothetical<br>protein                                    | 2.11 |
| HMPREF0536_10418 | ZP_08161498.1 | <i>N/A</i>  | hypothetical<br>protein                                    | 2.11 |
| HMPREF0536_10575 | ZP_08161655.1 | <i>yajC</i> | translocase<br>subunit                                     | 2.06 |
| HMPREF0536_11140 | ZP_08162219.1 | <i>rnc2</i> | ribonuclease III                                           | 2.06 |
| HMPREF0536_10903 | ZP_08161982.1 | <i>N/A</i>  | tetratricopeptide<br>repeat family<br>protein              | 2.01 |
| HMPREF0536_11418 | ZP_08162496.1 | <i>N/A</i>  | phage integrase<br>family                                  | 1.99 |

|                  |               |             |                                                                                              |      |
|------------------|---------------|-------------|----------------------------------------------------------------------------------------------|------|
|                  |               |             | integrase/recom<br>binase                                                                    |      |
| HMPREF0536_10246 | ZP_08161327.1 | N/A         | transposase                                                                                  | 1.98 |
| HMPREF0536_11375 | ZP_08162453.1 | N/A         | hypothetical<br>protein                                                                      | 1.97 |
| HMPREF0536_12080 | ZP_08163158.1 | N/A         | permease                                                                                     | 1.97 |
| HMPREF0536_11018 | ZP_08162097.1 | <i>mazG</i> | MazG nucleotide<br>pyrophosphohyd<br>rolase                                                  | 1.96 |
| HMPREF0536_11831 | ZP_08162909.1 | N/A         | arginine/ornithine<br>APC family<br>amino acid-<br>polyamine-<br>organocation<br>transporter | 1.96 |
| HMPREF0536_10283 | ZP_08161363.1 | <i>hsIR</i> | S4 domain<br>protein                                                                         | 1.95 |
| HMPREF0536_10991 | ZP_08162070.1 | <i>plsC</i> | 1-acylglycerol-3-<br>phosphate O-<br>acyltransferase                                         | 1.94 |
| HMPREF0536_11178 | ZP_08162257.1 | N/A         | hypothetical<br>protein                                                                      | 1.92 |
| HMPREF0536_11830 | ZP_08162908.1 | N/A         | hypothetical                                                                                 | 1.91 |



|                  |               |             |                                                    |      |
|------------------|---------------|-------------|----------------------------------------------------|------|
|                  |               |             | protein                                            |      |
| HMPREF0536_11157 | ZP_08162236.1 | <i>gmk</i>  | guanylate kinase                                   | 1.89 |
| HMPREF0536_11392 | ZP_08162470.1 | <i>N/A</i>  | hypothetical protein                               | 1.88 |
| HMPREF0536_10348 | ZP_08161428.1 | <i>nrdE</i> | ribonucleotide-diphosphate reductase subunit alpha | 1.86 |
| HMPREF0536_10535 | ZP_08161615.1 | <i>N/A</i>  | hypothetical protein                               | 1.85 |
| HMPREF0536_11480 | ZP_08162558.1 | <i>ctsR</i> | transcriptional regulator CtsR                     | 1.84 |
| HMPREF0536_10410 | ZP_08161490.1 | <i>N/A</i>  | hypothetical protein                               | 1.83 |
| HMPREF0536_10911 | ZP_08161990.1 | <i>N/A</i>  | membrane protein                                   | 1.83 |
| HMPREF0536_10609 | ZP_08161689.1 | <i>N/A</i>  | hypothetical protein                               | 1.82 |
| HMPREF0536_11078 | ZP_08162157.1 | <i>N/A</i>  | cell division membrane protein                     | 1.80 |
| HMPREF0536_10684 | ZP_08161764.1 | <i>frnE</i> | protein-disulfide isomerase                        | 1.78 |

|                  |               |             |                                              |      |
|------------------|---------------|-------------|----------------------------------------------|------|
| HMPREF0536_11943 | ZP_08163021.1 | <i>rpmH</i> | 50S ribosomal protein L34                    | 1.78 |
| HMPREF0536_11208 | ZP_08162287.1 | N/A         | Na <sup>+</sup> driven multidrug efflux pump | 1.77 |
| HMPREF0536_10995 | ZP_08162074.1 | <i>mvaS</i> | hydroxymethylglutaryl-CoA synthase           | 1.77 |
| HMPREF0536_11859 | ZP_08162937.1 | N/A         | hypothetical protein                         | 1.77 |
| HMPREF0536_10171 | ZP_08161252.1 | N/A         | MutT/nudix family hydrolase                  | 1.75 |
| HMPREF0536_10367 | ZP_08161447.1 | N/A         | M22 family O-sialoglycoprotein endopeptidase | 1.74 |
| HMPREF0536_10865 | ZP_08161944.1 | N/A         | XRE family transcriptional regulator         | 1.74 |
| HMPREF0536_11706 | ZP_08162784.1 | <i>cbiT</i> | precorrin-8W decarboxylase                   | 1.73 |
| HMPREF0536_10325 | ZP_08161405.1 | N/A         | PIN domain protein                           | 1.71 |
| HMPREF0536_11762 | ZP_08162840.1 | N/A         | IS30 family                                  | 1.71 |

|                  |               |             |                                                          |      |
|------------------|---------------|-------------|----------------------------------------------------------|------|
|                  |               |             | transposase                                              |      |
| HMPREF0536_10096 | ZP_08161177.1 | N/A         | polyprenyl<br>synthetase                                 | 1.70 |
| HMPREF0536_10932 | ZP_08162011.1 | <i>dgkA</i> | diacylglycerol<br>kinase                                 | 1.70 |
| HMPREF0536_11033 | ZP_08162112.1 | <i>rsmD</i> | ribosomal RNA<br>small subunit<br>methyltransferase<br>D | 1.69 |
| HMPREF0536_11347 | ZP_08162425.1 | N/A         | hypothetical<br>protein                                  | 1.69 |
| HMPREF0536_11220 | ZP_08162299.1 | N/A         | GTP-binding<br>protein                                   | 1.67 |
| HMPREF0536_10430 | ZP_08161510.1 | N/A         | carboxylesterase                                         | 1.67 |
| HMPREF0536_11008 | ZP_08162087.1 | N/A         | phage/plasmid<br>primase                                 | 1.67 |
| HMPREF0536_11624 | ZP_08162702.1 | N/A         | hypothetical<br>protein                                  | 1.66 |
| HMPREF0536_10462 | ZP_08161542.1 | N/A         | response<br>regulator                                    | 1.66 |
| HMPREF0536_11419 | ZP_08162497.1 | N/A         | type I restriction-<br>modification<br>system S subunit  | 1.65 |

|                  |               |              |                                                             |      |
|------------------|---------------|--------------|-------------------------------------------------------------|------|
| HMPREF0536_11086 | ZP_08162165.1 | <i>pbp1</i>  | penicillin-binding<br>protein 1                             | 1.65 |
| HMPREF0536_11883 | ZP_08162961.1 | <i>N/A</i>   | hypothetical<br>protein                                     | 1.65 |
| HMPREF0536_10280 | ZP_08161360.1 | <i>N/A</i>   | CBS domain<br>protein                                       | 1.65 |
| HMPREF0536_10931 | ZP_08162010.1 | <i>era</i>   | GTP-binding<br>protein Era                                  | 1.65 |
| HMPREF0536_11050 | ZP_08162129.1 | <i>N/A</i>   | hypothetical<br>protein                                     | 1.65 |
| HMPREF0536_10347 | ZP_08161427.1 | <i>nrdF</i>  | ribonucleotide-<br>diphosphate<br>reductase<br>subunit beta | 1.65 |
| HMPREF0536_11183 | ZP_08162262.1 | <i>araT2</i> | aromatic amino<br>acid<br>aminotransferase                  | 1.64 |
| HMPREF0536_11599 | ZP_08162677.1 | <i>N/A</i>   | hypothetical<br>protein                                     | 1.63 |
| HMPREF0536_10619 | ZP_08161699.1 | <i>thiD</i>  | phosphomethylp<br>yrimidine kinase                          | 1.63 |
| HMPREF0536_11171 | ZP_08162250.1 | <i>rpmA</i>  | 50S ribosomal                                               | 1.63 |

|                  |               |             |                                                                  |      |
|------------------|---------------|-------------|------------------------------------------------------------------|------|
|                  |               |             | protein L27                                                      |      |
| HMPREF0536_11718 | ZP_08162796.1 | <i>N/A</i>  | YjbE family<br>integral<br>membrane<br>protein                   | 1.62 |
| HMPREF0536_11308 | ZP_08162386.1 | <i>ptsH</i> | PTS family<br>porter<br>component HPr                            | 1.62 |
| HMPREF0536_10558 | ZP_08161638.1 | <i>mreC</i> | rod shape-<br>determining<br>protein MreC                        | 1.62 |
| HMPREF0536_10442 | ZP_08161522.1 | <i>rbsD</i> | ribose ABC<br>superfamily ATP<br>binding cassette<br>transporter | 1.62 |
| HMPREF0536_10572 | ZP_08161652.1 | <i>ruvA</i> | crossover<br>junction ATP-<br>dependent DNA<br>helicase RuvA     | 1.62 |
| HMPREF0536_10980 | ZP_08162059.1 | <i>cdsA</i> | phosphatidate<br>cytidyltransferase                              | 1.61 |
| HMPREF0536_11283 | ZP_08162361.1 | <i>fur</i>  | fur family                                                       | 1.61 |

|                  |               |             |                                                               |      |
|------------------|---------------|-------------|---------------------------------------------------------------|------|
|                  |               |             | transcriptional<br>regulator                                  |      |
| HMPREF0536_10856 | ZP_08161935.1 | <i>N/A</i>  | RecT protein                                                  | 1.61 |
| HMPREF0536_10701 | ZP_08161781.1 | <i>N/A</i>  | hypothetical<br>protein                                       | 1.61 |
| HMPREF0536_11063 | ZP_08162142.1 | <i>dapF</i> | diaminopimelate<br>epimerase                                  | 1.61 |
| HMPREF0536_11186 | ZP_08162265.1 | <i>miaA</i> | tRNA delta(2)-<br>isopentenylpyrop<br>hosphate<br>transferase | 1.61 |
| HMPREF0536_11626 | ZP_08162704.1 | <i>fur2</i> | fur family<br>transcriptional<br>regulator                    | 1.61 |
| HMPREF0536_11344 | ZP_08162422.1 | <i>N/A</i>  | transposase                                                   | 1.60 |
| HMPREF0536_10908 | ZP_08161987.1 | <i>N/A</i>  | hypothetical<br>protein                                       | 1.60 |
| HMPREF0536_10521 | ZP_08161601.1 | <i>ddlA</i> | D-alanine-D-<br>alanine ligase                                | 1.59 |
| HMPREF0536_10468 | ZP_08161548.1 | <i>N/A</i>  | cupredoxin<br>family domain<br>protein                        | 1.59 |
| HMPREF0536_11153 | ZP_08162232.1 | <i>fmt</i>  | methionyl-tRNA                                                | 1.59 |

|                  |               |             |                                              |      |
|------------------|---------------|-------------|----------------------------------------------|------|
|                  |               |             | formyltransferase                            |      |
| HMPREF0536_11833 | ZP_08162911.1 | <i>N/A</i>  | hypothetical protein                         | 1.58 |
| HMPREF0536_11285 | ZP_08162363.1 | <i>N/A</i>  | VanZ like family protein                     | 1.58 |
| HMPREF0536_10108 | ZP_08161189.1 | <i>ahpC</i> | alkyl hydroperoxide reductase C              | 1.57 |
| HMPREF0536_10252 | ZP_08161333.1 | <i>rpmE</i> | 50S ribosomal protein L31                    | 1.56 |
| HMPREF0536_11987 | ZP_08163065.1 | <i>N/A</i>  | OsmC family protein                          | 1.56 |
| HMPREF0536_10193 | ZP_08161274.1 | <i>N/A</i>  | pyridine nucleotide-disulfide oxidoreductase | 1.55 |
| HMPREF0536_10103 | ZP_08161184.1 | <i>rpsN</i> | 30S ribosomal protein S14                    | 1.55 |
| HMPREF0536_10659 | ZP_08161739.1 | <i>narI</i> | respiratory nitrate reductase                | 1.55 |
| HMPREF0536_11944 | ZP_08163022.1 | <i>dnaA</i> | DNA-directed DNA replication                 | 1.55 |

|                  |               |             |                                        |      |
|------------------|---------------|-------------|----------------------------------------|------|
|                  |               |             | initiator protein<br>DnaA              |      |
| HMPREF0536_10704 | ZP_08161783.1 | <i>endA</i> | DNA-entry<br>nuclease                  | 1.54 |
| HMPREF0536_10443 | ZP_08161523.1 | <i>fucP</i> | fucose permease                        | 1.54 |
| HMPREF0536_10382 | ZP_08161462.1 | <i>N/A</i>  | Ala-tRNA(Pro)<br>hydrolase             | 1.54 |
| HMPREF0536_11881 | ZP_08162959.1 | <i>N/A</i>  | oxidoreductase                         | 1.53 |
| HMPREF0536_11394 | ZP_08162472.1 | <i>gor2</i> | glutathione-<br>disulfide<br>reductase | 1.53 |
| HMPREF0536_10744 | ZP_08161823.1 | <i>recU</i> | recombination<br>protein U             | 1.53 |
| HMPREF0536_11007 | ZP_08162086.1 | <i>N/A</i>  | phage head-tail<br>adaptor             | 1.53 |
| HMPREF0536_10522 | ZP_08161602.1 | <i>N/A</i>  | hypothetical<br>protein                | 1.53 |
| HMPREF0536_10158 | ZP_08161239.1 | <i>N/A</i>  | phosphoglycerat<br>e mutase            | 1.53 |
| HMPREF0536_11346 | ZP_08162424.1 | <i>N/A</i>  | hypothetical<br>protein                | 1.53 |
| HMPREF0536_11958 | ZP_08163036.1 | <i>N/A</i>  | protein of<br>hypothetical             | 1.53 |



|                  |               |              | function DUF344                            |      |
|------------------|---------------|--------------|--------------------------------------------|------|
| HMPREF0536_10978 | ZP_08162057.1 | <i>proS</i>  | proline--tRNA<br>ligase                    | 1.52 |
| HMPREF0536_10610 | ZP_08161690.1 | <i>dedA</i>  | DedA family<br>membrane<br>protein         | 1.52 |
| HMPREF0536_10601 | ZP_08161681.1 | <i>N/A</i>   | hypothetical<br>protein                    | 1.52 |
| HMPREF0536_10385 | ZP_08161465.1 | <i>N/A</i>   | hypothetical<br>protein                    | 1.52 |
| HMPREF0536_11770 | ZP_08162848.1 | <i>N/A</i>   | hypothetical<br>protein                    | 1.52 |
| HMPREF0536_11787 | ZP_08162865.1 | <i>N/A</i>   | XRE family<br>transcriptional<br>regulator | 1.52 |
| HMPREF0536_11326 | ZP_08162404.1 | <i>N/A</i>   | transposase                                | 1.52 |
| HMPREF0536_11378 | ZP_08162456.1 | <i>N/A</i>   | glutamate-<br>cysteine ligase              | 1.52 |
| HMPREF0536_11379 | ZP_08162457.1 | <i>N/A</i>   | hypothetical<br>protein                    | 1.52 |
| HMPREF0536_11360 | ZP_08162438.1 | <i>cps1D</i> | capsular<br>biosynthesis<br>protein        | 1.52 |

|                  |               |             |                                                    |      |
|------------------|---------------|-------------|----------------------------------------------------|------|
| HMPREF0536_11348 | ZP_08162426.1 | <i>N/A</i>  | putative<br>autolysin                              | 1.51 |
| HMPREF0536_10100 | ZP_08161181.1 | <i>menG</i> | 2-heptaprenyl-1                                    | 1.51 |
| HMPREF0536_11198 | ZP_08162277.1 | <i>udk</i>  | uridine kinase                                     | 1.51 |
| HMPREF0536_10895 | ZP_08161974.1 | <i>N/A</i>  | hypothetical<br>protein                            | 1.51 |
| HMPREF0536_10449 | ZP_08161529.1 | <i>N/A</i>  | acyltransferase                                    | 1.50 |
| HMPREF0536_11945 | ZP_08163023.1 | <i>dnaN</i> | DNA-directed<br>DNA polymerase<br>III beta subunit | 1.50 |
| HMPREF0536_10737 | ZP_08161816.1 | <i>lspA</i> | signal peptidase<br>II                             | 1.50 |

**Supplemental Table S4: Functional clustering analysis\* of genes downregulated >1.5-fold in 6475*rsiR*-Stop mutant compared to WT 6475.**

| <b>Annotation Cluster</b>                | <b>KEGG ID</b> | <b>P-value</b> | <b>Clustered Genes</b>                   |
|------------------------------------------|----------------|----------------|------------------------------------------|
| Cysteine and methionine metabolism       | lrf00270       | 6.47E-04       | <i>metC, asd, ldh, sdaAA, ldh3, cysK</i> |
| Fatty acid biosynthesis                  | lrf00061       | 9.89E-04       | <i>accC, accB, fabG2, fabD, fabHA</i>    |
| Glycerolipid metabolism                  | lrf00561       | 0.004          | <i>glxK, dhaE/pduE, pduD, dhaB/pduC</i>  |
| Pyruvate metabolism                      | lrf00620       | 0.005          | <i>pdxB, aad, ldh, accC, accB, ldh3</i>  |
| Propanoate metabolism                    | lrf00640       | 0.015          | <i>ldh, accC, accB, ldh3</i>             |
| Tyrosine metabolism                      | lrf00350       | 0.019          | HMPREF0536_10279, <i>aad, mhpD</i>       |
| Glycine, serine and threonine metabolism | lrf00260       | 0.037          | <i>asd, glxK, sdaAA</i>                  |
| Two-component system                     | lrf02020       | 0.052          | <i>lyts, lytR, lrgA, lrgB</i>            |

\*RNA-seq data were analyzed using the complete *L. reuteri* JCM1112 reference genome. Genes downregulated >1.5-fold were subjected to DAVID functional clustering analysis with medium classification stringency to identify enriched biological themes according to KEGG Pathways. P-values were calculated using one-tailed Fisher Exact Test.

**Supplemental Table S5: Differentially expressed genes in 6475*rsiR*-Stop mutant compared to WT 6475 that contain seeding sequence complementarity of 10 base pairs or longer.**

| <b>Locus tag</b> | <b>Predicted gene product</b>      | <b>Fold regulation compared to WT 6475</b> |
|------------------|------------------------------------|--------------------------------------------|
| HMPREF0536_10932 | Diacylglycerol kinase              | 1.70-fold upregulated                      |
| HMPREF0536_11833 | Hypothetical protein               | 1.58-fold upregulated                      |
| HMPREF0536_10556 | DNA repair protein RadC            | 1.53-fold upregulated                      |
| HMPREF0536_10449 | Acyltransferase                    | 1.50-fold upregulated                      |
| HMPREF0536_10758 | Fructokinase                       | 3.18-fold downregulated                    |
| HMPREF0536_10046 | Exopolyphosphate                   | 2.05-fold downregulated                    |
| HMPREF0536_11723 | Propanol dehydrogenase <i>pduQ</i> | 1.88-fold downregulated                    |
| HMPREF0536_10279 | Hydratase/decarboxylase            | 1.74-fold downregulated                    |

**Supplemental Figure S1: Position of *rsiR* (HMPREF0536\_10683) in the *L. reuteri***

**ATCC PTA 6475 chromosome. *fabZ2* = 3-hydroxyacyl-[acyl-carrier-protein]**

dehydratase gene ; *accA* = Acetyl-coA carboxylase carboxyl transferase subunit alpha

gene ; *accC* = Acetyl-CoA carboxylase, biotin carboxylase gene ; *accD* = Acetyl-

coenzyme A carboxylase carboxyl transferase subunit beta gene ; *fabI* = Enoyl-[acyl-

carrier-protein] reductase [NADH] gene ; = ; *fnrE* = predicted dithio-disulfide isomerase

gene ; *rsiR* = *Lactobacillus reuteri*-Specific Immunoregulatory gene.

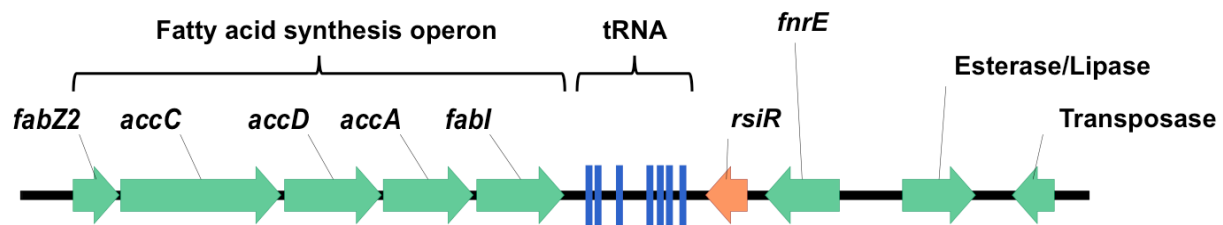

**Supplemental Figure S2: The *L. reuteri*::*rsiR* Complementation vector, pJKS104.**

The *E. coli*-*L. reuteri* shuttle vector, pJKS104, contains a full-length copy of wild type *rsiR* under the control of P<sub>23</sub> constitutive promoter. *ampR* = ampicilin resistance gene; *cat* = chloramphenicol resistance gene; pUC = *E. coli* origin of replication; *repA* = *L. reuteri* rolling circle replication protein; *rsiR* = *Lactobacillus reuteri*-Specific Immunoregulatory gene; Term = transcriptional terminator.

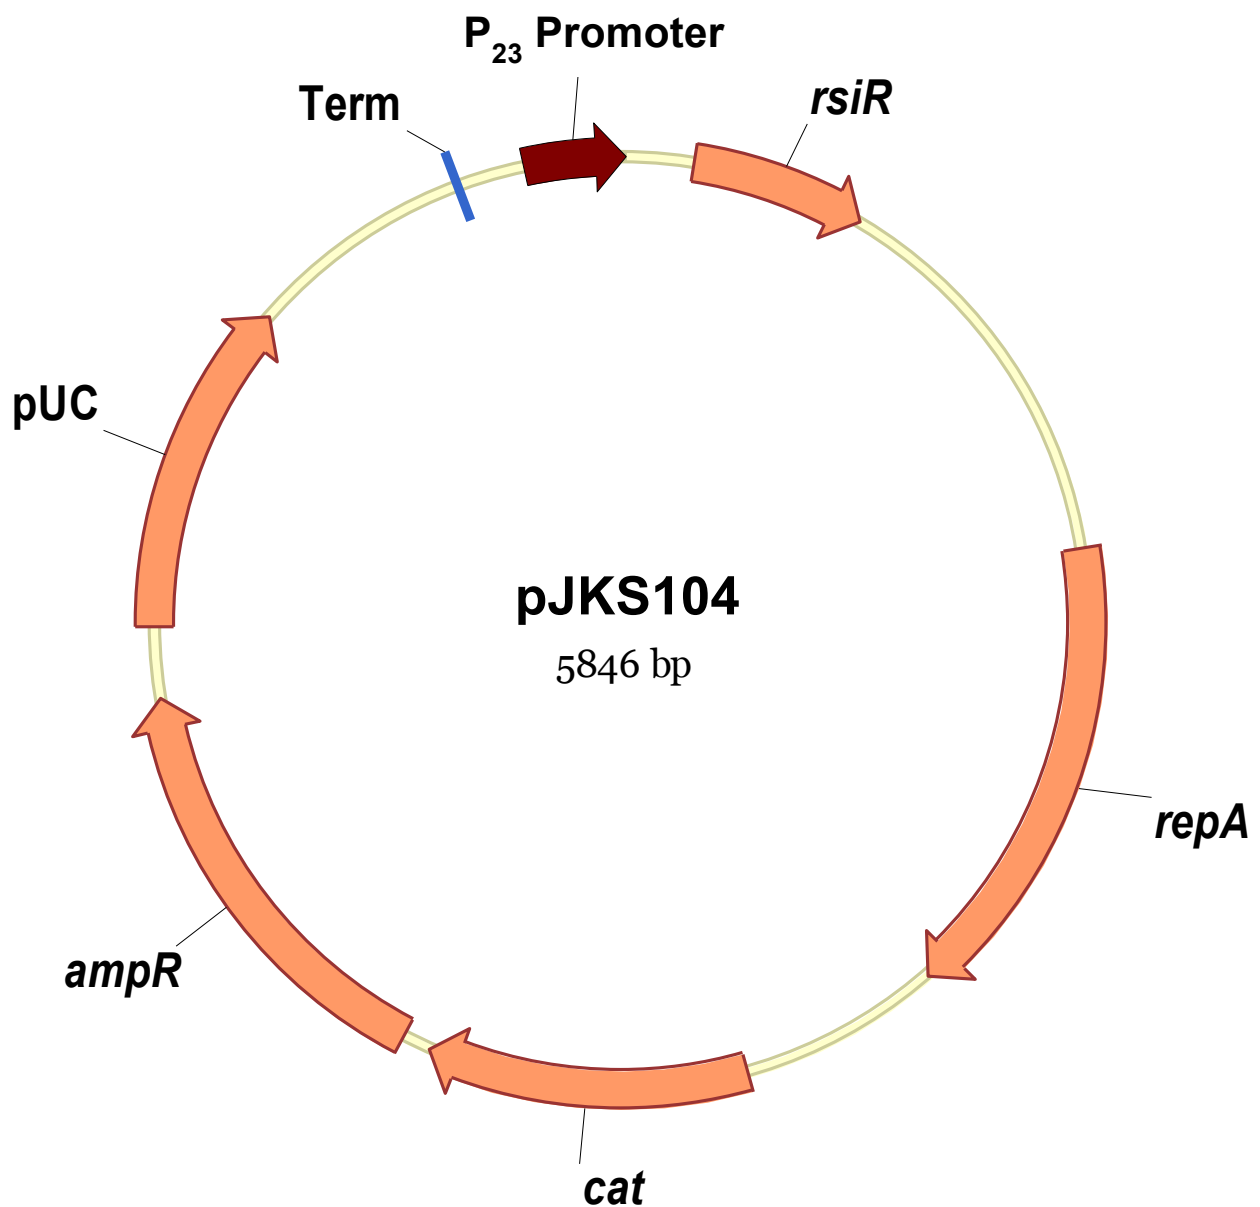

**Supplemental Figure S3: Promoter activity of  $P_{hdcAB}$  was tested using the *gusA3* reporter gene in pPH-R1. *ampR* = ampicillin resistance gene; *cat* = chloramphenicol resistance gene; *gusA3* = hyperactive  $\beta$ -glucuronidase gene;  $P_{hdcAB}$  = putative *hdcAB* promoter region; pUC = *E. coli* origin of replication; *repA* = *L. reuteri* rolling circle replication protein; Term = transcriptional terminator.**

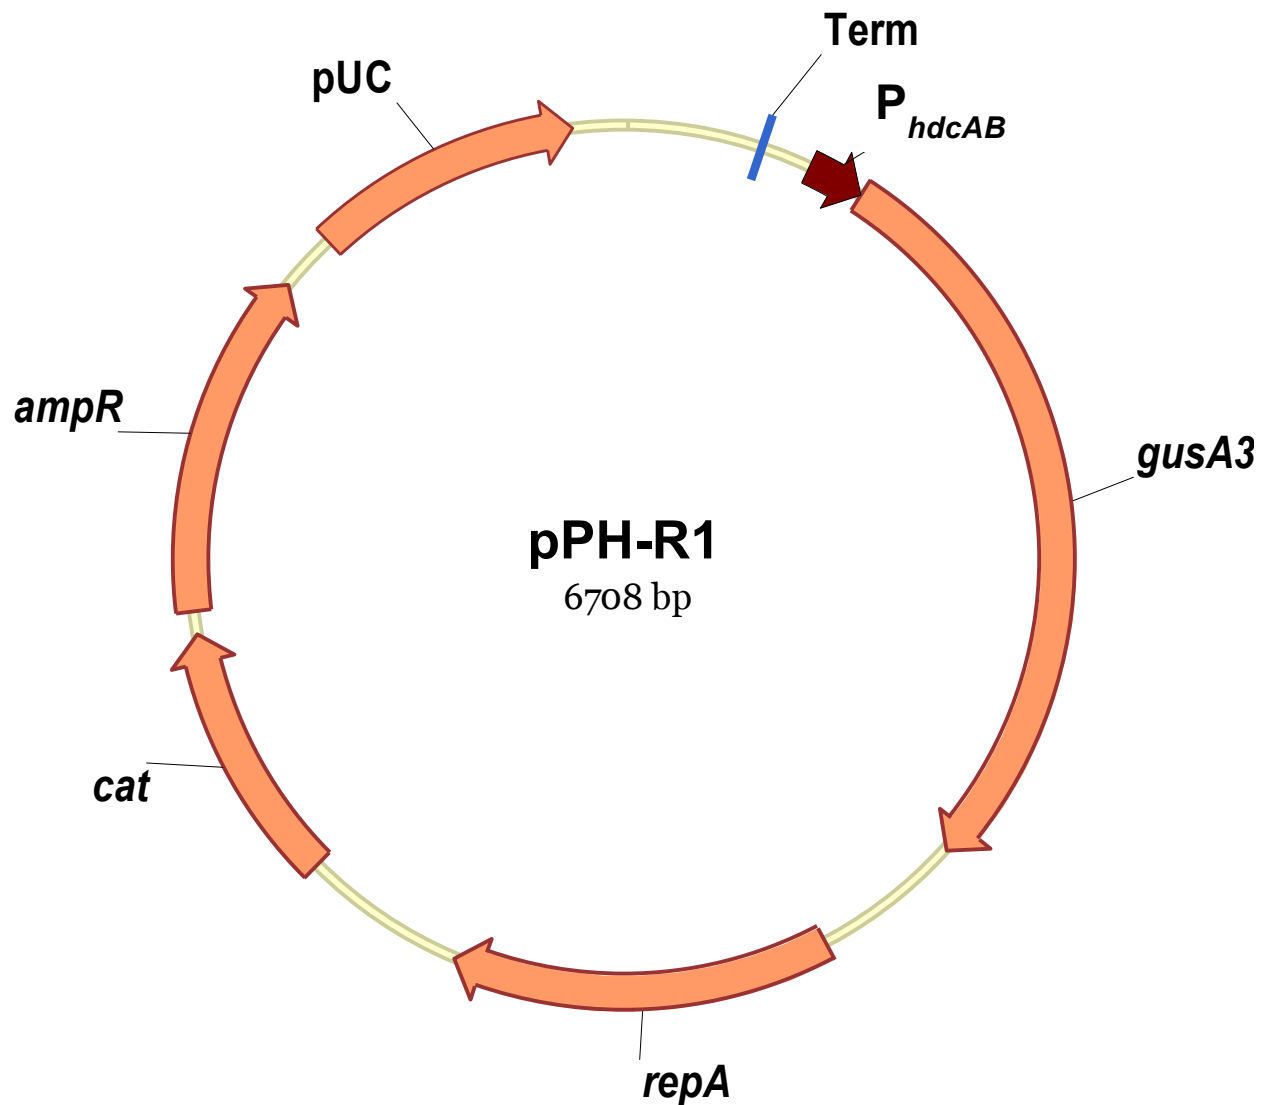

Supplement: JB.00261-13_zjb999092932so1.pdf [file JB.00261-13_zjb999092932so1.pdf]
